# Supplementary material
Source: publisher figshare collection journal article supplement (https://acs.figshare.com/ndownloader/files/4297603)
Supplement: Supplementary file 1 [file 4297603]

**Support information for:**  
**Multistep Growth Mechanism of Calcium Phosphate in the Earliest**  
**Stage of Morphology-Controlled Biomineralization**

Takayuki Nonoyama, <sup>†</sup>Takatoshi Kinoshita, <sup>†\*</sup> Masahiro Higuchi, <sup>‡</sup>  
Kenji Nagata, <sup>‡</sup> Masayoshi Tanaka, <sup>†</sup> Kimiyasu Sato<sup>§</sup> and Katsuya Kato<sup>§\*</sup>

<sup>†</sup>*Department of Frontier Materials, Nagoya Institute of Technology*

<sup>‡</sup>*Department of Materials Science and Engineering, Graduate School of  
Engineering, Nagoya Institute of Technology*

<sup>†‡</sup>*Gokiso-cho, Showa-ku, Nagoya, Aichi, 466-8555, Japan*

*E-mail: kinoshita.takatoshi@nitech.ac.jp*

<sup>§</sup>*National Institute of Advanced Industrial Science and Technology,  
2266-98 Anagahora, Shimo-Shidami moriyama-ku, Nagoya, Aichi,  
463-8560, Japan*

*E-mail: katsuya-kato@aist.go.jp*

|                                                                                                             |          |
|-------------------------------------------------------------------------------------------------------------|----------|
| <b>S1. MALDI-TOF-MS spectrum of (LE)<sub>8</sub>-PEG<sub>70</sub>.....</b>                                  | <b>2</b> |
| <b>S2. SERS spectrum of a (LE)<sub>8</sub>-PEG<sub>70</sub> monolayer.....</b>                              | <b>3</b> |
| <b>S3. QCM isotherm of calcium-ion adsorption on<br/>a (LE)<sub>8</sub>-PEG<sub>70</sub> monolayer.....</b> | <b>4</b> |

**S1. MALDI-TOF-MS spectrum of (LE)<sub>8</sub>-PEG<sub>70</sub>**

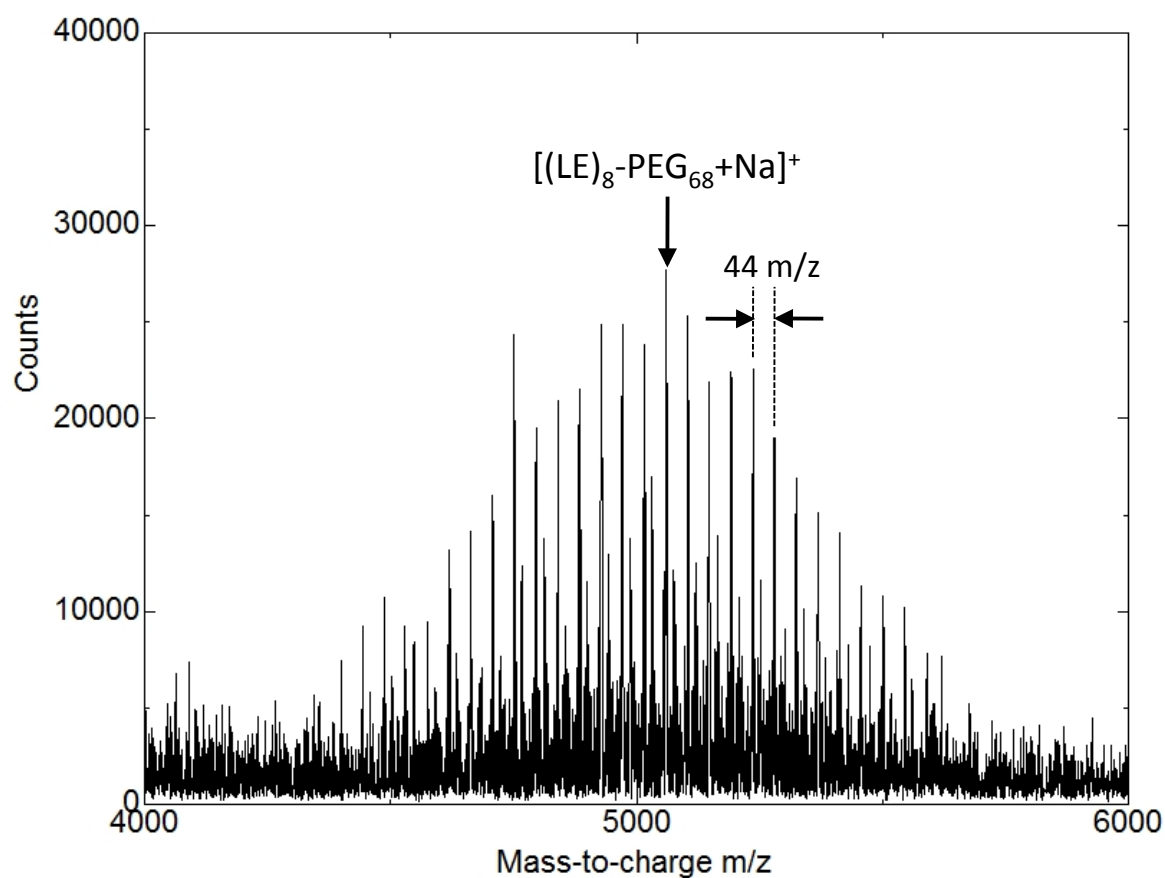

Peptide synthesis was confirmed by MALDI-TOF-MS.  $\alpha$ -Cyano-4-hydroxycinnamic acid and 3-aminoquinoline were used as the matrix. The molecular weight distribution based on polyethylene glycol was observed from 4000 to 6000 m/z. The maximum peak is consistent with the mass of  $(LE)_8-PEG_{68}+Na$ .

## ***S2. SERS spectrum of a (LE)<sub>8</sub>-PEG<sub>70</sub> monolayer***

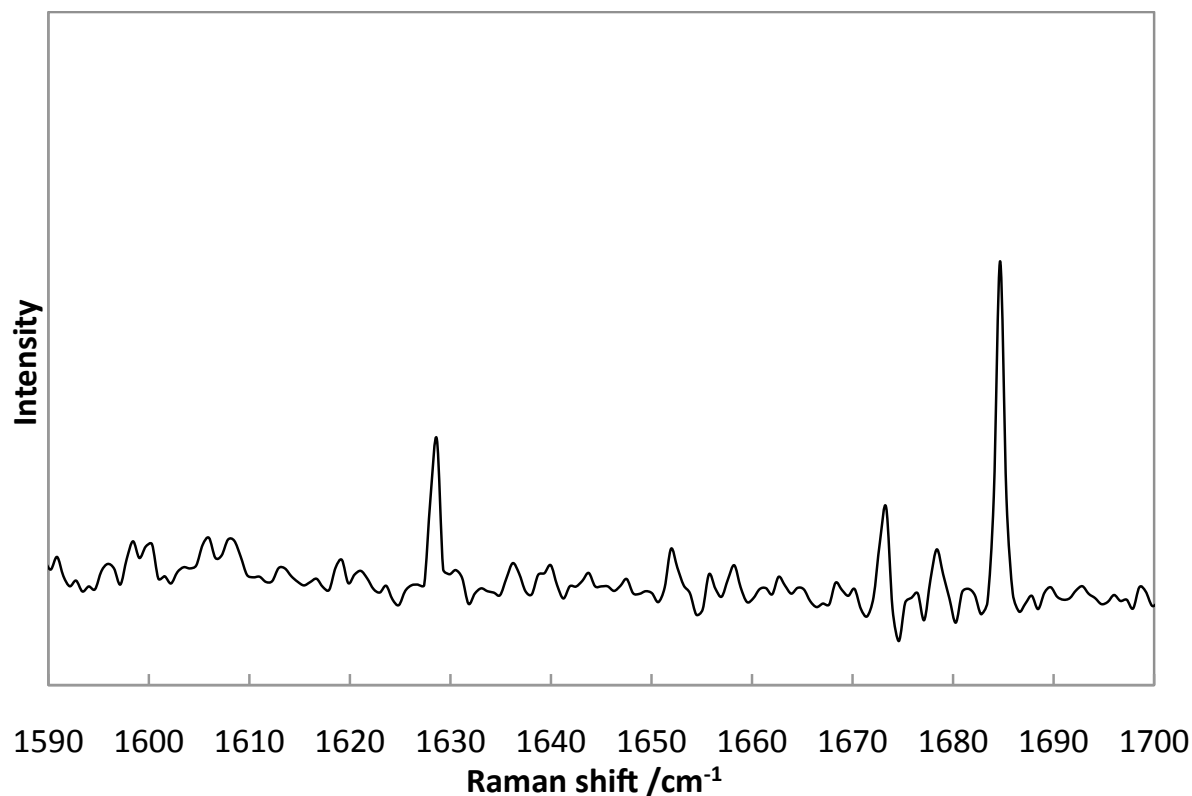

The secondary structure of the (LE)<sub>8</sub>-PEG<sub>70</sub> peptide monolayer was measured by SERS spectroscopy. The monolayer was formed on a gold-nanoparticle-coated glass substrate. The excitation wavelength was 532.1 nm. The peaks at 1628 and 1685 cm<sup>-1</sup> were assigned to amide I of the antiparallel  $\beta$ -sheet and the  $\beta$ -plated sheet, respectively.

### ***S3. QCM isotherm of calcium-ion adsorption on a $(LE)_8\text{-PEG}_{70}$ monolayer***

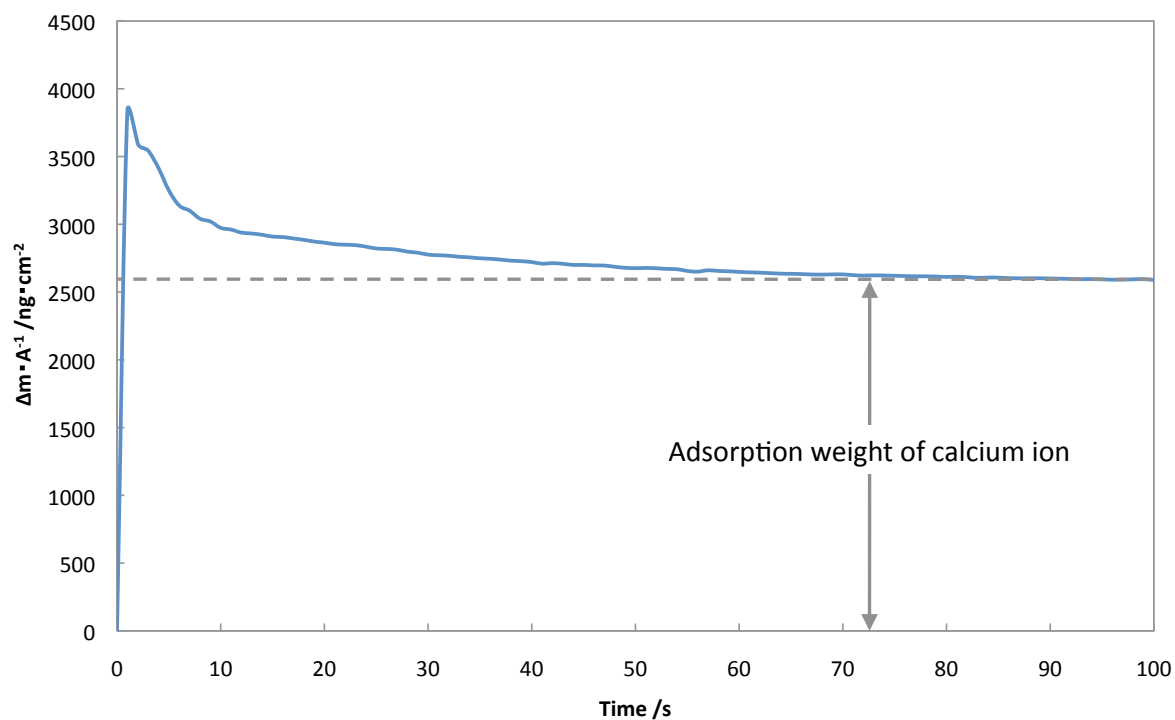

The weight of calcium ions onto the  $(LE)_8\text{-PEG}_{70}$  monolayer was estimated from the difference between the zero base weight and the weight at adsorption equilibrium. If the weight increase in Figure 4 is solely caused by the adsorbed  $\text{PO}_4$ , then, the Ca/P ratio is 0.97 as calculated from Ca and  $\text{PO}_4$  adsorption measurement. This value is consistent with the value of 1.01 determined by EDX measurement.
